# Supplementary material for: Comprehensive Analysis of Large-Scale Transcriptomes from Multiple Cancer Types
Source: MDPI journal article supplement (doi:10.3390/genes12121865), 2021-11-24
Supplement: s1 [file s1]

## Supplementary Figures

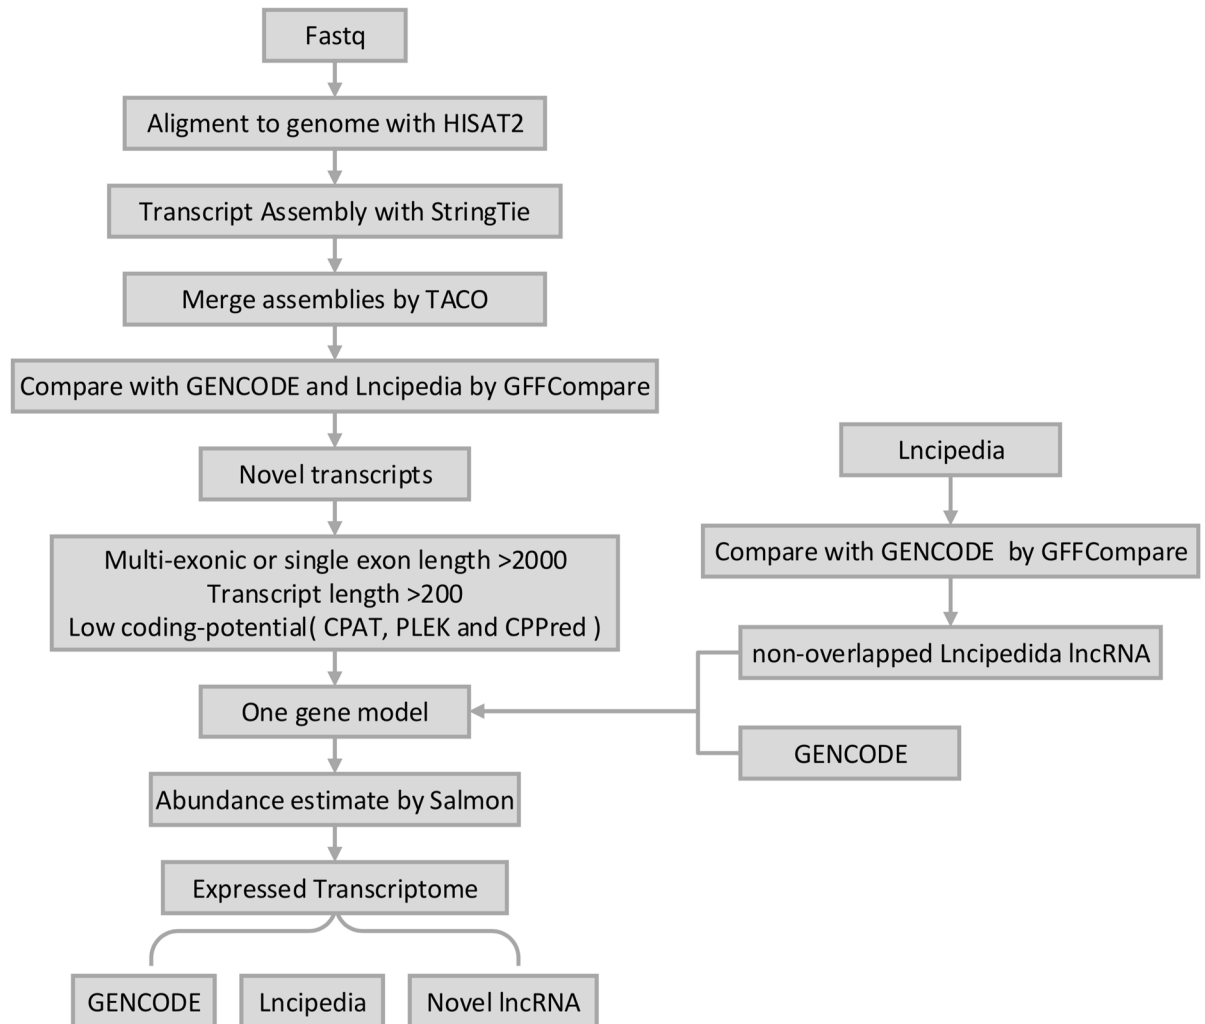

**Figure. S1.** The detailed processing pipeline to construct customized reference annotations with novel lncRNA genes.

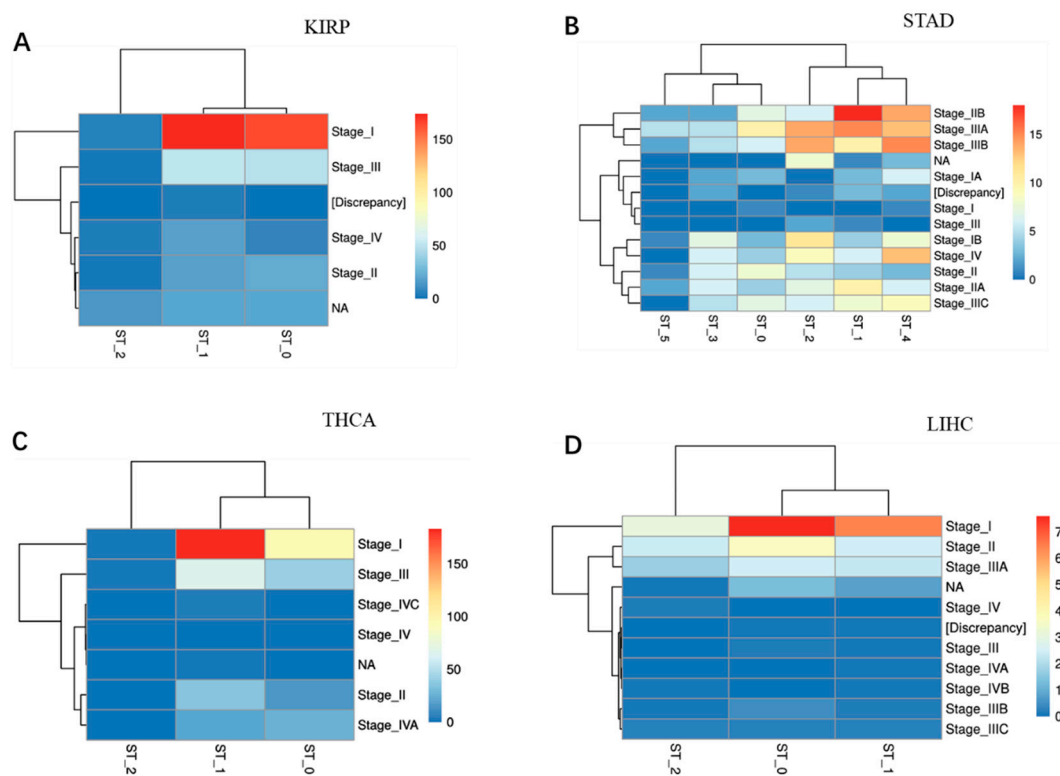

**Figure. S2.** Comparison of PipeOne subtypes with cancer pathological stages in cancers, including KIRP (A), STAD (B), THCA(C) and LIHC (D).

## Supplementary Table Legends

**Table S1.** Cancer-associated features shared across multiple cancer types.

**Table S2.** Enriched pathways and disease annotations of cancer-associated features for each cancer type.

**Table S3.** PipeOne identified cancer subtypes for each cancer type.

**Table S4.** Subtype-contributing features shared in at least three cancer types.
